# Supplementary material
Source: Springer Nature journal article supplement (https://www.springermedizin.de/resource/supplementary/12985_2010_1064_MOESM1_ESM.pdf/9609062)

A.

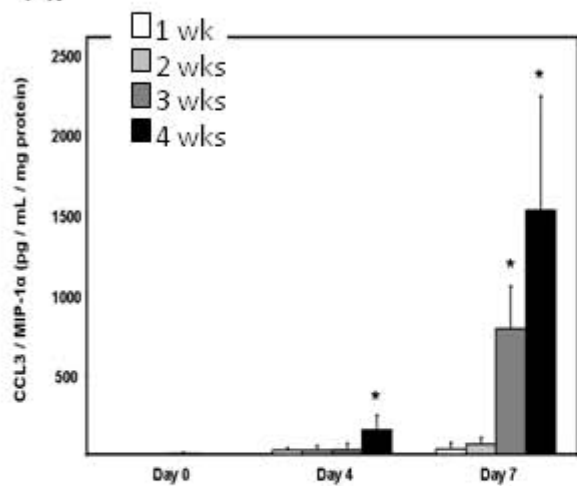

B.

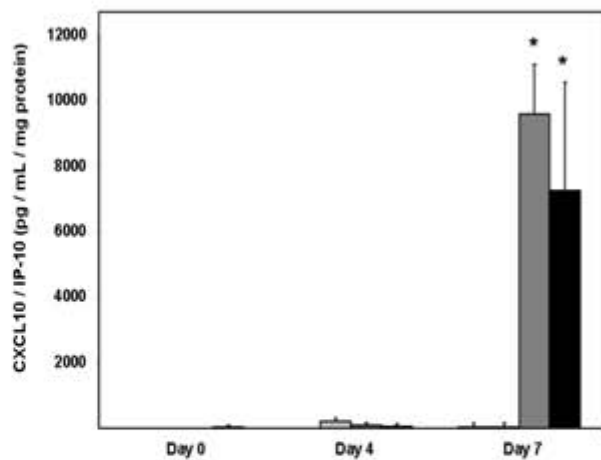

C.

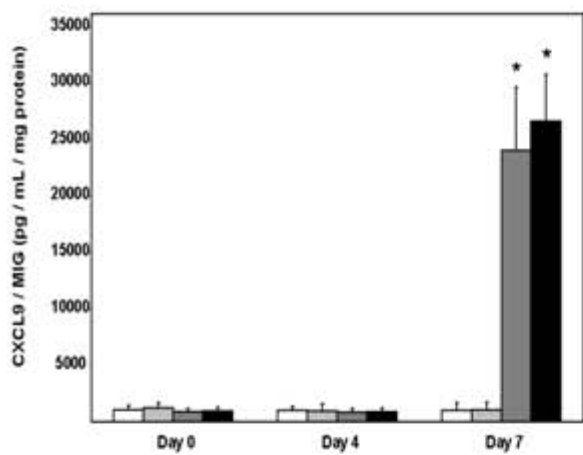

D.

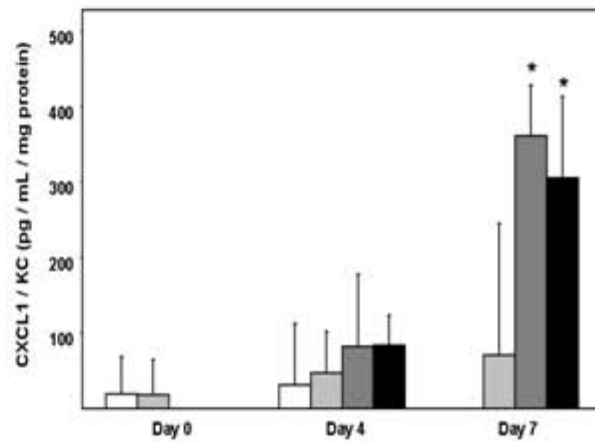

E.

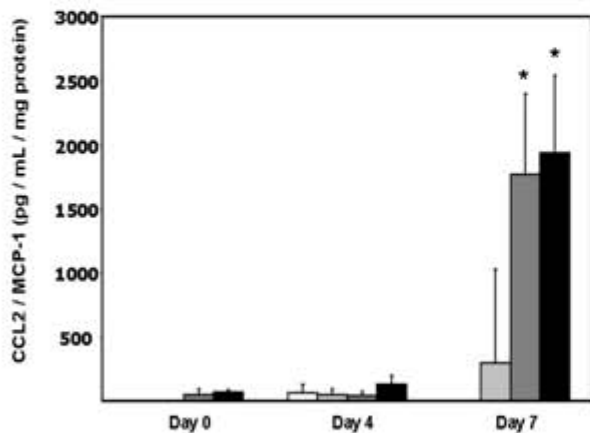

F.

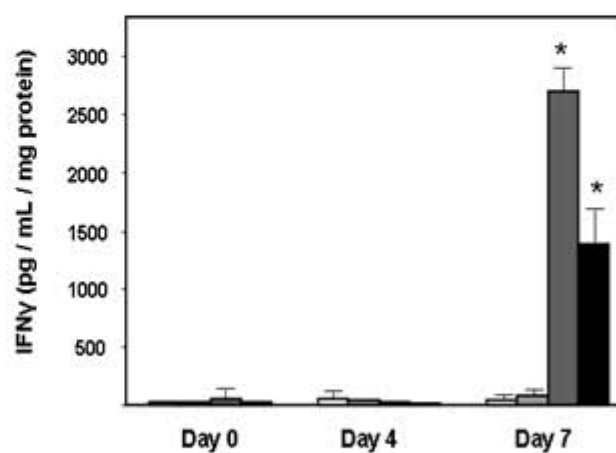

Supplement: MOESM1 [file 9609062]
